# Supplementary material for: Does Coenzyme Q10 Supplementation Improve Testicular Function and Spermatogenesis in Male Mice with Chronic Kidney Disease?
Source: MDPI journal article supplement (doi:10.3390/biology10080786), 2021-08-17
Supplement: s1 [file s1]

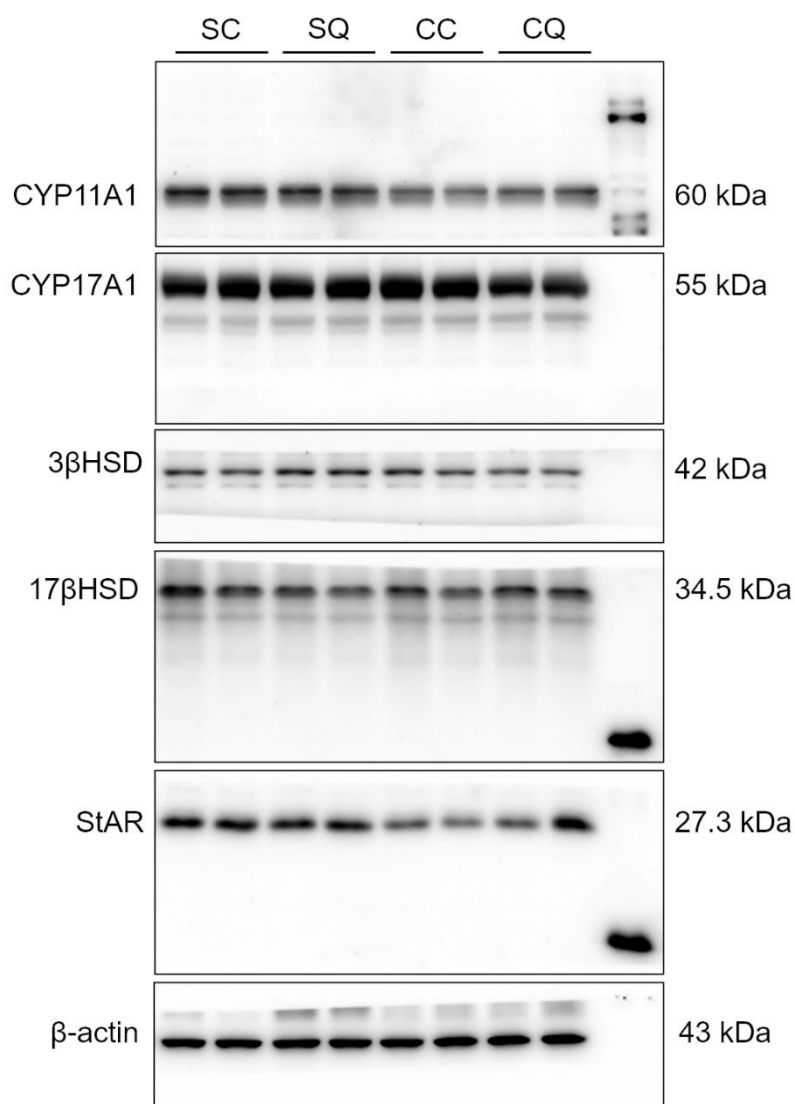

|                 | SC    |       | SQ    |       | CC    |       | CQ    |       |
|-----------------|-------|-------|-------|-------|-------|-------|-------|-------|
| CYP11A1/β-actin | 0.836 | 0.939 | 1.027 | 0.963 | 0.721 | 0.597 | 0.672 | 0.726 |
| CYP17A1/β-actin | 1.139 | 1.070 | 0.997 | 1.064 | 1.003 | 0.977 | 0.849 | 0.834 |
| 3βHSD/β-actin   | 0.759 | 0.768 | 1.097 | 1.031 | 0.989 | 0.801 | 0.705 | 0.661 |
| 17βHSD/β-actin  | 0.940 | 0.837 | 0.871 | 0.720 | 0.936 | 0.750 | 0.898 | 0.837 |
| StAR/β-actin    | 1.064 | 1.031 | 0.941 | 1.026 | 0.759 | 0.608 | 0.652 | 0.914 |

**Figure S1.** Whole western blot and densitometry readings/intensity ratio of testosterone biosynthesis enzymes in the sham surgery and CKD surgery mice treated with vehicle (corn oil) or CoQ10.

SC: sham surgery mice with vehicle; SQ: sham surgery mice with CoQ10; CC: CKD surgery mice with vehicle; CQ: CKD surgery mice with CoQ10.

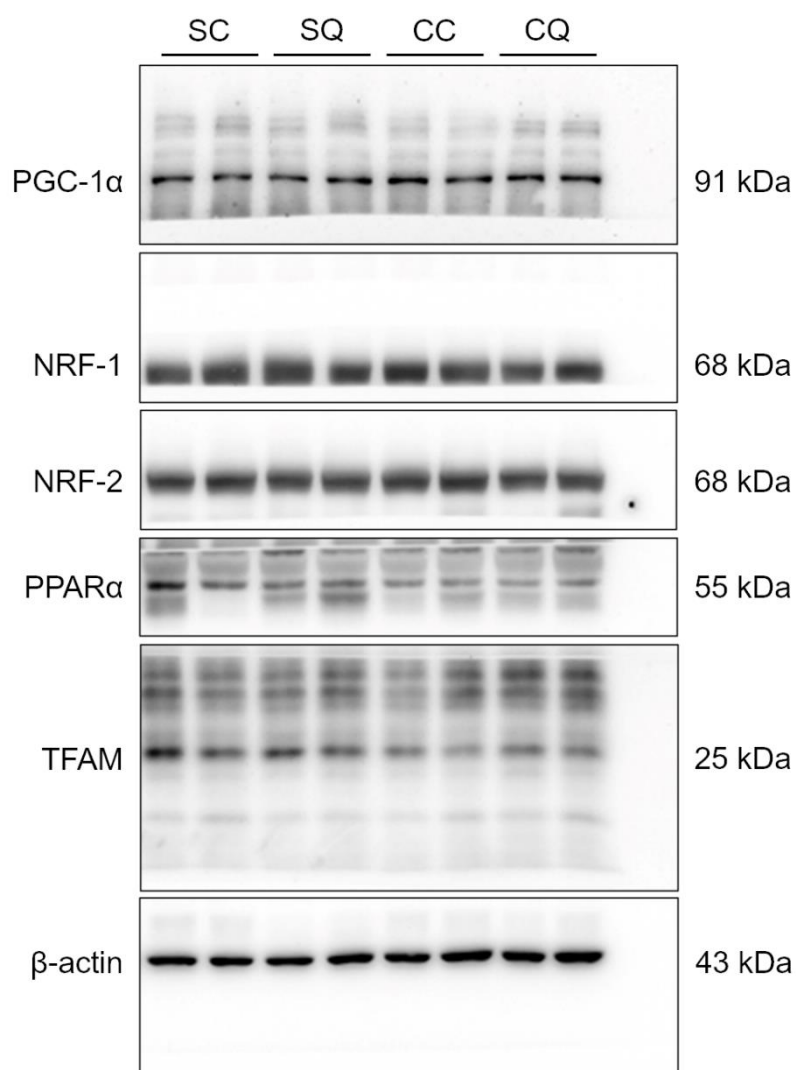

|                | SC    |       | SQ    |       | CC    |       | CQ    |       |
|----------------|-------|-------|-------|-------|-------|-------|-------|-------|
| PGC-1α/β-actin | 0.813 | 0.845 | 0.789 | 0.891 | 0.978 | 0.718 | 0.754 | 0.660 |
| NRF-1/β-actin  | 0.898 | 1.241 | 1.393 | 0.975 | 1.180 | 0.942 | 0.864 | 0.869 |
| NRF-2/β-actin  | 1.128 | 1.201 | 1.024 | 0.963 | 1.057 | 1.090 | 0.939 | 0.967 |
| PPARα/β-actin  | 0.761 | 0.483 | 0.719 | 0.837 | 0.459 | 0.523 | 0.415 | 0.456 |
| TFAM/β-actin   | 0.723 | 0.597 | 0.752 | 0.698 | 0.528 | 0.421 | 0.535 | 0.513 |

**Figure S2.** Whole western blot and densitometry readings/intensity ratio of testicular mitochondria biogenesis markers in the sham surgery and CKD surgery mice treated with vehicle (corn oil) or CoQ10.

SC: sham surgery mice with vehicle; SQ: sham surgery mice with CoQ10; CC: CKD surgery mice with vehicle; CQ: CKD surgery mice with CoQ10.
